# Supplementary material for: High-Throughput Mass Spectrometric Analysis of the Whole Proteome and Secretome From Sinorhizobium fredii Strains CCBAU25509 and CCBAU45436
Source: Front Microbiol. 2019 Nov 12;10:2569. doi: 10.3389/fmicb.2019.02569 (PMC6865838; doi:10.3389/fmicb.2019.02569)
Supplement: Supplementary file 1 [file Table_1.xlsx]

## Sheet: 56 Genomes for 16s rRNA 
Supplementary Table S1. The 56 selected genomes for phylogenetic and Nops distribution analysis
Project accession	Strain Names	Genome size (bp)	Host
GCA_001549695.1	B. diazoefficiens NK6	10475157	Glycine max
GCA_000648595.2	B. diazoefficiens SEMIA 5080	9085533	Glycine max
GCA_000011365.1	B. diazoefficiens USDA 110	9105828	Glycine hispida
GCA_000261505.1	B. elkanii CCBAU 05737	9773178	Glycine max
GCA_000261525.1	B. elkanii CCBAU 43297	9347700	Glycine max
GCA_000379145.1	B. elkanii USDA 76	9484767	Glycine max
GCA_000519225.1	B. elkanii USDA 94	9558895	Glycine max
GCA_000472745.1	B. japnicum USDA 38	9608975	Glycine max
GCA_000261545.1	B. japonicum CCBAU 15354	10126594	Glycine max
GCA_000261585.1	B. japonicum CCBAU 15618	9824012	Glycine max
GCA_000261605.1	B. japonicum CCBAU 25435	9460795	Glycine max
GCA_000807315.1	B. japonicum E109	9224208	Glycine max
GCA_001038185.1	B. japonicum FN1	9138496	Glycine max
GCA_001280585.1	B. japonicum Is-1	8983878	Glycine max
GCA_000661935.1	B. japonicum SEMIA 5079	9583037	Glycine max
GCA_000473025.1	B. japonicum USDA 122	8976980	Glycine max
GCA_000482525.1	B. japonicum USDA123	10457665	Glycine max
GCA_000284375.1	B. japonicum USDA6	9207384	Glycine max
GCA_000261765.1	Bradyrhizobium sp. CCBAU 41267	9121826	Glycine max
GCA_000185905.1	M. ciceri WSM1271	6690028	Biserrula pelecinus
GCA_001618825.1	M. ciceri CC1192	6943628	Cicer arietinum
GCA_000472365.1	M. ciceri CMG6	6910194	Cicer arietinum
GCA_001618845.1	M. ciceri WSM1284	6880454	Biserrula pelecinus
GCA_000513875.1	Mesorhizobium. sp WSM1293	6938611	Lotus japonicum
GCA_000009265.1	R. leguminosarum 3841	7751309	Biovar viciae
GCA_000419705.1	R. leguminosarum FA23	7545552	Biovar phaseoli
GCA_000427765.1	R. leguminosarum VF39	7647401	Biovar viciae
GCA_000372305.1	R. leguminosarum WSM1481	7555578	Biovar viciae
GCA_001612535.1	R. leguminosarum Vaf12	7665676	Vavilovia formosa
GCA_000271805.1	R. leguminosarum WSM1455	7557514	Biovar viciae
GCA_000261845.1	S. fredii CCBAU 05557	6587698	G.max
GCA_000261865.1	S. fredii CCBAU 25509	6580016	G.soja
GCA_000261885.1	S. fredii CCBAU 45436	6815462	G.max
GCA_000261905.1	S. fredii CCBAU 83622	6567745	G.max
GCA_000261925.1	S. fredii CCBAU 83643	6876949	G.max
GCA_000261945.1	S. fredii CCBAU 83666	6838011	G.max
GCA_000261965.1	S. fredii CCBAU 83753	6832812	G.max
GCA_000219415.2	S. fredii GR64	7143004	G.max
GCA_000283895.1	S. fredii HH103	7221188	G.max
GCA_001461695.1	S. fredii USDA 205	6579820	G.max
GCA_000419665.1	S. medicae DI28	6553624	Medicago arabica
GCA_000378785.1	S. medicae WSM1115	6861065	Medicago polymorpha
GCA_000372345.1	S. medicae WSM1369	6402557	Medicago sphaerocarpa
GCA_000419785.1	S. medicae WSM244	6650282	Medicago polymorpha
GCA_000017145.1	S. medicae WSM419	6817576	Medicago murex
GCA_000006965.1	S. meliloti 1021	6691694	?Medicago truncatula
GCA_000346065.1	S. meliloti 2011	6693185	Medicago truncatula
GCA_000473425.1	S. meliloti AK58	6974333	Medicago truncatula
GCA_000147795.3	S. meliloti AK83	7140471	Medicago truncatula
GCA_000147775.3	S. meliloti BL225C	6978785	Medicago truncatula
GCA_000473405.1	S. meliloti BO21CC	6989037	Medicago truncatula
GCA_000320385.2	S. meliloti GR4	7141709	Medicago truncatula
GCA_000304415.1	S. meliloti Rm41	7149690	Medicago truncatula
GCA_000747295.1	S. meliloti RMO17	6733414	Medicago truncatula
GCA_000218265.1	S. meliloti SM11	7173736	Medicago truncatula
GCA_000427485.1	S. meliloti WSM4191	7227575	Medicago truncatula
